# Supplementary material for: Analysis of genome-wide association study data using the protein knowledge base
Source: PubMed Central journal article supplement (PMC3261104; doi:10.1186/1471-2156-12-98), 2011-11-13

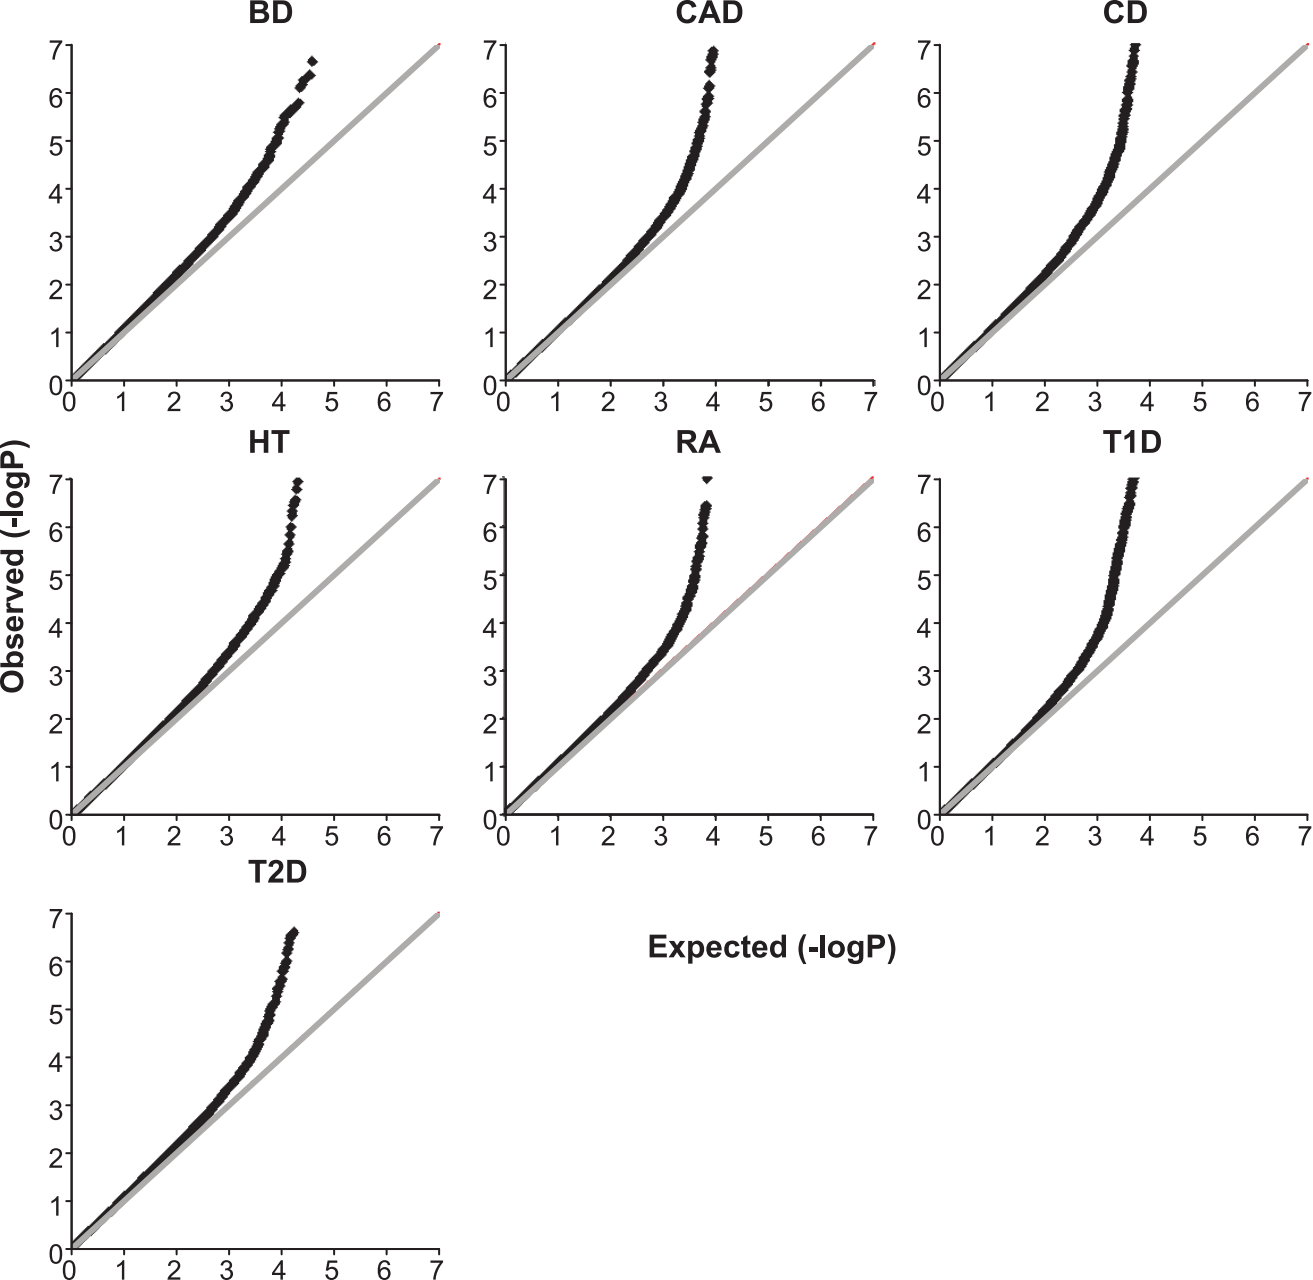

Supplement: 1471-2156-12-98-S2.pdf [file 1471-2156-12-98-S2.pdf]
